# Supplementary material for: Light quality affects the proliferation of in vitro cultured plantlets of Camellia oleifera Huajin
Source: PeerJ. 2020 Oct 6;8:e10016. doi: 10.7717/peerj.10016 (PMC7547595; doi:10.7717/peerj.10016)
Supplement: Data S1 — The spectral distribution of LED light sources utilised (data obtained using a Hopocolor OHSP-350SF Spectral Colour Luminance Meter) and data for all tables. [file peerj-08-10016-s001.xlsx]

## Sheet: Fig1
Fig1:Spectral distribution of LED light sources utilised (data obtained using a Hopocolor OHSP-350SF Spectral Colour Luminance Meter).
Wavelength/nm	WL	4R:1B	BL	1R:4B	RL
350	0.794253	0.194522	0.075068	0.404245	0.126015
355	1.08712	0.254217	0.11739	0.512604	0.066126
360	1.86719	0.177192	0.088443	0.111483	0.021756
365	9.76553	0.14796	0.128554	0.235115	0.007294
370	0.551763	0.165005	0.242318	0.250455	0.051131
375	0.881203	0.081415	0.150234	0.455668	0.093269
380	0.912743	0.064251	0.119268	0.396252	0.132435
385	0.580928	0.169882	0.18465	0.450293	0.013011
390	0.479252	0.132426	0.165878	0.487205	0.003274
395	0.693704	0.089079	0.326616	0.531665	0.087072
400	6.41353	0.154254	0.609886	0.672322	0.096958
405	28.382	0.240197	1.14621	1.17336	0.16089
410	6.25249	0.416217	2.71147	2.96308	0.032885
415	10.0388	0.831618	7.53078	8.20665	0.036181
420	15.6279	1.63907	19.169	21.0391	0.085662
425	23.6574	3.15365	42.6057	46.3087	0.205099
430	35.805	5.74114	81.2362	87.0228	0.222879
435	166.477	9.97562	137.015	143.977	0.906417
440	53.8603	14.6701	206.505	213.464	0.321026
445	52.6799	20.6302	267.605	271.649	0.390168
450	54.5663	26.3777	277.725	284.569	0.41047
455	54.0535	31.3457	229.324	246.615	0.373986
460	51.0719	34.6819	159.285	187.076	0.306045
465	46.8661	34.1256	103.733	134.133	0.346665
470	41.8517	29.1409	66.147	92.9334	0.282721
475	36.7808	21.9576	40.3212	60.6991	0.262496
480	41.1385	15.4869	23.6492	37.9435	0.287318
485	79.8126	10.6286	13.916	23.412	0.457704
490	68.651	7.03143	8.27597	14.1819	0.396154
495	45.0873	4.39361	4.97461	8.52484	0.30052
500	30.7248	2.79005	3.16507	5.22029	0.236909
505	27.7013	1.77659	2.07458	3.40956	0.171056
510	31.1567	1.19551	1.43264	2.28488	0.188096
515	30.9389	0.81231	1.02987	1.54911	0.214391
520	25.9096	0.56444	0.659541	1.09973	0.195364
525	21.0599	0.421194	0.511388	0.827212	0.149552
530	19.0807	0.316986	0.470273	0.606057	0.114043
535	35.7485	0.313893	0.404526	0.501307	0.268689
540	224.767	0.705888	0.748207	0.669783	1.33409
545	326.538	0.920698	0.914814	0.699999	1.93442
550	111.453	0.385956	0.40635	0.356381	0.666709
555	26.3642	0.200997	0.204992	0.241292	0.22782
560	9.74939	0.188085	0.13751	0.198157	0.226405
565	5.79039	0.199612	0.133419	0.199429	0.335407
570	3.83552	0.297994	0.123516	0.182416	0.431832
575	19.6739	0.447673	0.152679	0.215378	0.721753
580	45.1619	0.70543	0.143252	0.300658	1.31133
585	63.3755	1.14776	0.153697	0.380836	2.23779
590	44.988	1.85936	0.114461	0.490529	3.4812
595	30.6812	3.2065	0.18533	0.705835	5.8273
600	24.185	5.69704	0.179739	1.06354	9.81679
605	22.1821	9.95686	0.15835	1.73257	16.4386
610	262.43	17.972	0.691287	3.1091	28.846
615	110.53	30.3089	0.363822	4.9527	46.9167
620	47.7613	50.5691	0.234118	8.32512	76.4449
625	53.7323	79.4215	0.343584	13.5444	118.851
630	49.4152	109.664	0.416452	18.9636	164.408
635	10.4717	122.28	0.367716	20.0884	189.269
640	6.52363	91.5439	0.276148	12.91	155.879
645	7.37362	48.1214	0.152695	6.01094	89.3686
650	15.4632	23.0833	0.14755	2.87893	44.3889
655	9.74185	10.3282	0.047368	1.32511	21.2277
660	9.048	4.46491	0.028428	0.707665	9.88481
665	7.36198	2.07795	0.07247	0.372679	4.69067
670	5.726	1.12807	0.047132	0.181257	2.37512
675	4.86809	0.687432	0.062503	0.145017	1.28051
680	6.01776	0.464521	0.01618	0.110175	0.883234
685	8.37464	0.335791	0.087192	0.101756	0.623108
690	5.83239	0.316308	0.151554	0.02681	0.566949
695	3.26817	0.30027	0.013209	0.067859	0.485809
700	1.80847	0.348989	0.041298	0.152319	0.609058
705	18.3868	0.571525	0.061768	0.207049	0.97933
710	23.2328	0.737238	0.118449	0.250027	1.17043
715	4.07568	0.842049	0.098879	0.224097	1.33019
720	0.85209	0.858741	0.028542	0.175501	1.47071
725	0.850939	0.952029	0.021272	0.163763	1.51621
730	1.42471	0.97535	0.01838	0.197661	1.73841
735	0.85782	1.03959	0.015162	0.336223	1.76788
740	1.14943	0.947372	0.013056	0.21522	1.63326
745	1.37655	0.912194	0.039625	0.213324	1.50981
750	1.37407	0.919451	0.073755	0.269108	1.44739
755	1.10884	0.848009	0.092196	0.184852	1.33936
760	1.11675	0.721722	0.00016	0.170349	1.21382
765	1.22816	0.64263	0.027477	0.162518	0.998166
770	1.1877	0.520727	0.079808	0.265089	0.730034
775	1.00221	0.472349	0.08339	0.024948	0.61754
780	1.02118	0.286261	0.049864	0.104305	0.629421
785	1.28551	0.265382	0.041627	0.1653	0.417837
790	1.44897	0.150845	0.00782	0.009775	0.255985
795	1.41885	0.167433	0.036085	0.087428	0.070332
800	1.77499	0.193948	0.03454	0.077219	0.191939
805	2.46093	0.183759	0.059456	0.051063	0.317079
810	5.61077	0.182429	0.220665	0.15657	0.448981
815	1.4919	0.298921	0.082291	0.161393	0.34059
820	1.39525	0.282144	0.092451	0.283695	0.212605
825	1.54566	0.32696	0.308252	0.432671	0.342502
830	1.45443	0.498968	0.656149	0.731464	0.426874
835	1.6874	0.505594	0.694216	1.06484	0.65577
840	2.58503	0.465146	1.19665	1.30026	0.702429
845	2.23932	0.732416	1.69581	2.00026	0.597148
850	2.06448	0.839635	2.63885	2.95932	0.903438
855	1.75808	1.25471	3.38611	4.12908	1.2917
860	2.10443	1.34925	4.9888	5.45785	1.39919
865	2.20524	1.54778	6.32934	7.52299	1.68712
870	18.5392	1.84113	8.01779	9.11571	1.68899
875	3.7984	2.11124	10.1081	11.3511	1.88766
880	1.91438	2.44426	12.8107	14.1819	2.40846
885	1.67243	2.73379	14.9391	16.7501	2.49018
890	2.21078	2.98061	17.358	18.2778	2.52378
895	1.72926	3.16589	19.0384	19.6101	2.42825
900	1.55205	3.25729	18.9426	19.7275	2.57393
905	1.53611	3.24979	17.6851	18.3595	2.26345
910	1.2219	3.43532	15.3245	16.2074	2.14137
915	1.13764	3.02739	12.666	14.7293	2.04965
920	1.43653	3.14596	10.509	12.5193	1.02609
925	1.84705	3.02488	7.84921	10.6258	1.06403
930	0.49407	2.72676	7.06009	9.33102	1.33191
935	1.10953	2.70221	6.11039	7.88266	1.23951
940	0.742173	2.6352	4.66207	7.18161	0.599408
945	0.239433	2.6558	3.46006	6.10776	0.409132
950	1.36647	2.43644	2.88299	3.8104	1.32182

## Sheet: Table1
Light Source	Multiplication	shoot height (cm)
WL	5.33	1.3
WL	5	1.4
WL	5	2.2
WL	4.33	1
WL	4.67	1.8
WL	5	0.6
WL	5	0.5
WL	4.33	1
WL	4.67	0.7
WL	4.67	1.2
WL	4.33	0.8
WL	4.67	1.5
WL	4	0.4
WL	4.33	0.6
WL	5	1
4R:1B	7	1.2
4R:1B	7.67	1.1
4R:1B	7.33	2.8
4R:1B	7.33	1.8
4R:1B	7	1.6
4R:1B	7.33	2.6
4R:1B	8	1.4
4R:1B	8	1
4R:1B	7.67	1.6
4R:1B	7.33	2.2
4R:1B	6.67	2.3
4R:1B	7.67	1.1
4R:1B	7	0.8
4R:1B	7.33	0.8
4R:1B	6.67	0.8
BL	5	1.3
BL	5.33	1.6
BL	5	2
BL	5	1.4
BL	5.33	1.6
BL	5.33	1
BL	5	1
BL	5	0.8
BL	5	0.7
BL	5.33	2
BL	5	0.6
BL	4.67	2.1
BL	5	0.8
BL	5	1
BL	4.67	0.7
1R:4B	5.33	0.7
1R:4B	5.33	1.5
1R:4B	5.67	0.5
1R:4B	6	0.4
1R:4B	5	0.8
1R:4B	6.67	0.5
1R:4B	5.67	1.8
1R:4B	6.33	0.7
1R:4B	5	0.6
1R:4B	6	1.3
1R:4B	5.33	0.5
1R:4B	6	0.4
1R:4B	5.33	1.4
1R:4B	5.67	0.3
1R:4B	6	0.7
RL	2.67	2.6
RL	2	1.7
RL	2.67	1.4
RL	1.67	1.8
RL	2.67	1.1
RL	2.33	2.4
RL	2.67	1.4
RL	2	1.3
RL	2.67	1.2
RL	2	1.5
RL	2.67	2.8
RL	2.67	1.6
RL	2.33	1.4
RL	2.67	1.1
RL	2.67	2.1

## Sheet: Table2
Table 2 Leaf length, width, and area
Light Source	Leaf length (mm)	Leaf width (mm)	Leaf area (mm2)	Leaf number
WL	30.073	19.99	250.21	7
WL	20.09	18.51	300	9
WL	24.772	17.85	332.54	8
WL	30.63	12.24	418.55	6
WL	28.774	14.92	400	7
WL	26.053	19.35	304.71	7
WL	22.114	18.24	300	10
WL	30.545	16.79	401.02	11
WL	20.68	15.7	422.53	8
WL	29.463	15.16	396.52	9
4R:1B	21.815	11.32	243.43	12
4R:1B	15.801	12.75	120.86	18
4R:1B	15.228	12.72	100	18
4R:1B	21.047	13.06	183.12	13
4R:1B	16.492	13.33	155.98	12
4R:1B	19.317	11.92	202.73	14
4R:1B	20.322	11.46	207.83	14
4R:1B	21.119	9.65	212.59	16
4R:1B	23.944	11.19	261.43	13
4R:1B	16.424	13.71	150.67	15
BL	24.285	15.99	277.4	10
BL	21.866	14.69	242.09	12
BL	27.193	16.45	320.07	8
BL	23.827	14.24	244.67	12
BL	21.621	12.16	213.05	14
BL	21.278	15.33	261.62	12
BL	24.239	14.76	301.94	14
BL	22.489	13.06	264.07	16
BL	22.667	12.69	279.71	14
BL	30.548	13.86	376.47	11
1R:4B	18.765	10.61	164.73	10
1R:4B	26.249	11.42	373.18	10
1R:4B	24.554	11.74	273.09	10
1R:4B	19.769	13.57	190.94	13
1R:4B	21.054	13.71	180.8	17
1R:4B	18.545	11.89	210.25	15
1R:4B	19.041	12.95	215.17	15
1R:4B	19.952	14.53	178.73	10
1R:4B	18.355	19.38	146.5	15
1R:4B	15.274	11.05	145.82	11
RL	20.457	13.71	229.36	9
RL	20.73	15.48	208.62	8
RL	18.618	15.69	174.6	8
RL	20.777	13.55	240.76	7
RL	24.842	11.96	207.64	11
RL	22.735	13.95	229.88	10
RL	20.775	12.45	202.22	8
RL	22.61	13.02	260.35	5
RL	23.137	12.43	226.74	7
RL	21.906	12.83	210.39	6

## Sheet: Table3
	Table 3 Effect of light spectral quality on primary metabolites in tissue-cultured plantlets
Light Source	Chlorophyll a (mg/g FW)	Chlorophyll b (mg/g FW)	Carotenoids (mg/g FW)	Total chlorophyll (mg/g FW)	Chlorophyll a/b	Soluble protein (gprot/L FW)	RuBisCO (U/g FW)		Table 3 Effect of light spectral quality on primary metabolites in tissue-cultured plantlets
WL	1.3719	0.4895	0.2305	1.84	2.92	4.14058	69.772		Light source	WL	4R:1B	BL	1R:4B	RL
WL	1.3316	0.4942	0.2531	1.83	2.69	5.09381	75.23		Chlorophyll a (mg/g FW)	1.3172± 0.06a	0.9512±0.13b	0.7871±0.11bc	0.6111±0.14c	0.809± 0.19bc
WL	1.2482	0.4766	0.2149	1.67	2.93	5.65979	77		Chlorophyll b (mg/g FW)	0.4638± 0.03a	0.3394±0.05b	0.2601±0.04bc	0.2384±0.05c	0.3128±0.08bc
4R:1B	0.8449	0.3135	0.1856	1.16	2.7	7.38751	41.6		Carotenoids (mg/g FW)	0.2388± 0.04a	0.2196±0.05a	0.1507±0.02b	0.1188±0.01b	0.143± 0.02b
4R:1B	1.102	0.3428	0.2176	1.49	2.81	6.01725	43.42		Total chlorophyll (mg/g FW)	1.781± 0.09a	1.2907±0.18b	1.0471±0.15bc	0.8495±0.19c	1.1218±0.27bc
4R:1B	0.9068	0.3497	0.2245	1.22	2.91	6.52365	49.9		Chlorophyll a/b	2.8455±0.13ab	2.8024±0.10b	3.0335±0.08a	2.5559±0.15c	2.5945±0.08c
BL	0.9104	0.2059	0.1875	1.22	2.98	6.34492	78.237		Soluble protein (gprot/L FW)	4.96± 0.77B	6.64±0.69A	5.60±0.64B	4.89±0.42B	5.95±0.84B
BL	0.7497	0.25	0.1448	1	3	5.24275	80.782		RuBisCO (U/g FW)	74.00±2.18A	44.97±2.52C	80.45±1.19A	26.17±2.68D	60.24±3.56B
BL	0.7011	0.2243	0.1473	0.93	3.13	5.21296	82.316
1R:4B	0.6778	0.2746	0.1411	0.95	2.47	4.79593	24.86
1R:4B	0.7053	0.2588	0.1151	0.96	2.73	5.3619	31.32
1R:4B	0.4501	0.2819	0.1206	0.63	2.47	7.50667	22.329
RL	0.5994	0.3296	0.125	0.83	2.61	6.9109	60.58
RL	0.9744	0.319	0.1722	1.36	2.5	5.30233	53.91
RL	0.8532	0.3198	0.1589	1.17	2.67	5.65979	66.23

## Sheet: Table4
Table 4 Effect of light spectral quality on stomatal characteristics
Light Source	Length (μm)	Width (μm)	Aspect ratio	Circumference (μm)	Area (μm2)	number per 40000 μm2
WL	23.434	2.505	2.2657	49.186	90.212	8
WL	18.529	3.069	2.3355	46.153	90.637	10
WL	22.057	1.599	2.3616	39.312	91.061	11
WL	19.293	3.978	2.4558	38.731	91.91	10
WL	19.524	5.25	2.5613	46.083	91.91	10
WL	16.727	2.908	2.5813	45.898	94.032	9
WL	21.055	1.784	2.5918	41.582	94.881	6
WL	17.029	2.554	2.6187	39.278	94.881	8
WL	20.039	6.947	2.7854	44.45	95.056	8
WL	19.653	3.33	2.8264	37.576	96.578	8
WL	20.221	2.313	2.9719	43.122	96.578	9
WL	19.063	3.186	2.9855	41.075	91.671	9
WL	18.887	5.753	3.0198	39.19	95.915	9
WL	19.423	6.142	3.0222	43.288	96.34	8
WL	20.119	7.769	3.0255	44.665	96.764	8
WL	20.633	6.218	3.0514	36.963	97.613	8
WL	18.231	4.952	3.0806	40.961	97.613	10
WL	18.08	8.24	3.0956	38.236	98.462	8
WL	18.655	3.581	3.2014	34.858	98.886	9
WL	17.296	4.952	3.2597	45.561	90.584	8
WL	18.791	6.08	3.2797	44.449	91.008	10
WL	21.294	7.434	3.356	43.106	91.432	8
WL	20.357	9.284	3.5102	44.695	92.281	9
WL	15.659	5.663	3.5209	45.463	95.252	10
WL	17.032	4.797	3.5878	43.739	96.95	6
WL	21.979	5.646	3.638	42.662	97.374	8
WL	21.009	8.686	3.6809	45.165	97.374	11
WL	18.06	4.299	3.7029	43.973	97.798	8
WL	18.909	6.784	3.7121	45.119	100.918	8
WL	20	6.049	3.8161	40.631	100.072	9
4R:1B	13.506	4.598	1.9381	24.697	62.202	11
4R:1B	11.148	2.664	1.9512	35.111	52.667	10
4R:1B	11.204	6.816	1.9581	25.59	53.05	12
4R:1B	10.564	5.827	2.0129	27.939	53.45	12
4R:1B	14.745	4.561	2.0379	31.47	53.899	12
4R:1B	13.378	5.737	2.0428	26.826	54.625	12
4R:1B	12.966	5.011	2.1195	29.497	55.851	10
4R:1B	16.699	4.847	2.1232	28.843	56.446	11
4R:1B	12.772	5.816	2.1282	23.446	57.104	11
4R:1B	15.439	6.152	2.1299	31.546	57.294	9
4R:1B	13.804	4.526	2.1391	28.355	58.568	10
4R:1B	17.271	3.267	2.1777	29.802	58.992	10
4R:1B	14.007	4.987	2.1878	32.726	59.416	9
4R:1B	16.028	4.213	2.2728	29.24	59.416	10
4R:1B	13.038	3.645	2.3469	31.306	60.265	11
4R:1B	18.895	3.487	2.3718	27.975	61.963	9
4R:1B	13.728	5.643	2.3786	34.562	61.963	10
4R:1B	16.172	4.943	2.4686	40.656	63.236	11
4R:1B	14.303	5.334	2.5002	32.761	63.66	10
4R:1B	18.73	5.552	2.5351	37.787	64.509	10
4R:1B	15.787	6.438	2.5651	35.126	65.358	10
4R:1B	15.911	6.152	2.605	35.149	66.631	11
4R:1B	14.699	4.241	2.625	34.639	61.48	12
4R:1B	13.651	4.66	2.7347	28.806	57.905	12
4R:1B	13.7	4.365	2.7527	39.114	68.039	11
4R:1B	12.178	6.547	2.7779	27.294	58.329	11
4R:1B	15.6	7.733	2.7994	26.631	68.753	9
4R:1B	9.577	6.69	2.8068	34.058	59.602	9
4R:1B	16.349	5.481	2.8153	31.769	65.358	9
4R:1B	13.262	4.429	2.8284	39.328	69.602	11
BL	17.04	7.49	1.697	53.785	112.99	10
BL	16.05	9.16	1.07	45.297	105.491	10
BL	16.65	12.1	1.605	38.25	105.915	11
BL	17.49	8.03	1.889	46.927	106.696	11
BL	12.19	7.67	1.9004	40.337	117.009	8
BL	14.58	6.81	0.8823	42.193	108.037	10
BL	16.56	7.58	1.5665	41.524	109.735	11
BL	18.88	7.61	1.7074	45.651	118.223	10
BL	15.64	9.11	1.9646	40.508	108.492	12
BL	16.63	8.5	1.6262	42.615	108.647	12
BL	16.96	5.872	1.4288	48.321	108.832	10
BL	12.836	6.91	2.2361	31.543	119.496	10
BL	16.394	8.012	1.8002	40.992	110.345	12
BL	11.771	6.596	1.6706	31.816	111.194	9
BL	15.669	8.986	1.6428	35.146	116.87	9
BL	16.172	6.715	2.13	46.777	119.257	9
BL	15.908	6.778	1.6559	44.387	119.682	10
BL	17.592	9.401	1.929	40.09	120.106	9
BL	17.541	7.196	2.2675	43.392	111.379	10
BL	18.937	7.428	2.325	30.209	111.804	8
BL	14.303	4.235	1.8784	37.516	122.69	10
BL	20.903	5.988	1.2306	38.066	113.077	10
BL	13.751	9.428	2.074	37.127	114.35	9
BL	18.275	6.801	2.2924	49.273	119.019	11
BL	14.824	10.06	1.6775	42.875	115.809	8
BL	17.823	8.864	1.965	43.608	116.233	10
BL	23.841	9.614	1.5901	40.982	118.355	10
BL	12.439	10.344	1.8575	42.843	110.489	11
BL	12.292	8.692	1.4154	36.888	115.552	11
BL	15.015	15.015	1.7936	48.941	116.844	9
1R:4B	15.5	10.13	1.5355	36.14	87.056	12
1R:4B	13.74	10.4	1.9133	35.921	77.48	10
1R:4B	20.03	6.62	1.8296	29.156	87.905	10
1R:4B	17.11	7.51	3.2276	30.553	88.329	8
1R:4B	14.99	7.75	2.3144	31.007	80.027	12
1R:4B	15.05	9.19	2.093	28.787	82.997	12
1R:4B	19.05	8.44	1.8214	46.037	84.695	13
1R:4B	11.94	8.62	1.7989	36.029	78.09	12
1R:4B	20.44	7.69	1.9077	32.753	79.363	10
1R:4B	15.313	6.49	1.7732	39.268	80.637	11
1R:4B	11.64	7.845	1.3141	36.567	81.485	11
1R:4B	14.022	6.871	2.1552	29.145	85.305	12
1R:4B	16.738	8.221	1.6464	31.766	88.276	11
1R:4B	13.257	7.173	1.2758	29.335	89.973	8
1R:4B	13.067	8.202	1.2315	26.859	90.822	13
1R:4B	12.154	5.421	1.6779	31.737	90.822	12
1R:4B	24.822	5.988	1.7899	32.92	91.247	12
1R:4B	13.447	5.872	1.387	33.147	93.369	8
1R:4B	15.334	5.872	2.1946	30.869	93.369	11
1R:4B	15.441	8.045	1.4908	47.636	93.793	11
1R:4B	13.179	8.944	1.2063	41.581	93.793	11
1R:4B	17.218	6.416	1.3652	36.627	95.915	11
1R:4B	17.626	8.819	1.551	37.978	86.34	9
1R:4B	19.471	6.707	1.4627	40.063	89.31	9
1R:4B	15.879	10.103	1.3585	40.739	91.008	11
1R:4B	14.748	11.456	0.8379	43.25	91.008	9
1R:4B	13.743	12.382	1.321	30.926	92.281	13
1R:4B	15.669	7.688	0.9711	26.989	92.706	11
1R:4B	18.033	13.037	0.8536	41.398	93.13	12
1R:4B	12.382	9.81	1.6792	41.549	89.496	12
RL	20.91	8.77	2.991	43.221	161.989	8
RL	20.24	3.92	1.5222	51.321	163.263	7
RL	18.32	10.35	1.683	49.501	165.385	8
RL	18.58	7.94	1.8683	43.563	160.053	8
RL	19.67	11.26	2.3629	45.394	168.117	6
RL	20.33	7.4	1.0007	44.914	168.966	7
RL	20.74	8.57	1.3588	48.946	169.39	8
RL	15.45	9.14	2.3508	43.087	160.239	7
RL	19.36	6.69	2.1727	57.493	151.512	9
RL	23.51	6.37	1.5722	52.723	156.605	8
RL	19.975	9.325	1.3496	59.171	160	8
RL	16.988	10.323	1.9094	49.676	160.849	6
RL	20.186	13.287	1.8017	53.51	170.61	8
RL	20.372	9.485	1.7133	47.209	172.732	8
RL	20.392	11.292	1.3115	52.555	174.854	8
RL	19.837	8.794	1.8026	56.568	166.127	7
RL	18.029	7.228	1.7623	51.557	166.552	8
RL	16.688	8.555	1.1913	43.954	167.401	9
RL	19.022	7.973	1.0023	50.864	167.401	8
RL	16.811	12.957	2.1393	44.338	169.523	7
RL	16.957	9.535	2.0866	51.838	160.371	8
RL	19.755	8.388	1.4916	53.293	161.645	6
RL	20.278	7.973	1.4525	52.653	172.069	8
RL	21.598	9.396	1.8976	50.091	162.493	8
RL	24.695	8.252	1.8404	39.569	162.493	8
RL	17.181	5.646	1.6814	49.481	164.615	8
RL	22.184	10.727	1.8769	47.797	166.737	8
RL	19.808	11.862	1.3226	41.549	161.83	7
RL	19.931	10.753	1.3779	44.332	162.255	8
RL	23.018	10.892	2.2912	50.473	162.255	9

## Sheet: Table5
Table 5 Effect of light quality on leaf anatomy
	Thickness of upper epidermis/μm	Thickness of palisade parenchyma/μm	Thickness of spongy parenchyma/μm	Thickness of lower epidermis /μm	Thickness of blade/μm
WL	11.714	28.444	57.312	9.202	114.61
WL	11.294	29.699	57.724	7.529	108.33
WL	13.176	28.862	55.632	7.947	104.99
WL	14.431	28.025	64.417	6.274	104.15
WL	12.235	28.025	58.56	7.529	110.01
WL	14.117	29.699	55.214	9.202	106.66
WL	10.876	30.953	55.632	7.529	104.15
WL	12.13	30.117	50.613	10.457	114.19
WL	12.549	28.862	56.887	10.876	110.84
WL	12.549	31.79	55.214	8.366	110.42
4R:1B	12.564	58.979	84.704	6.274	143.89
4R:1B	11.921	47.058	78.429	5.647	150.17
4R:1B	11.039	43.293	89.723	9.725	154.34
4R:1B	12.549	47.058	95.37	8.784	151.83
4R:1B	12.549	46.43	81.566	7.215	151
4R:1B	10.666	48	106.036	6.902	155.18
4R:1B	15.686	40.156	90.35	7.843	143.89
4R:1B	15.196	47.058	86.586	7.015	151.83
4R:1B	11.921	42.665	88.468	7.529	150.58
4R:1B	15.941	51.45	84.704	8.739	150.16
BL	8.366	33.463	83.24	9.621	131.76
BL	10.876	33.045	80.312	8.046	129.87
BL	10.457	32.208	78.22	7.67	129.87
BL	9.202	33.881	81.985	7.741	126.11
BL	8.366	30.117	79.893	8.368	119.21
BL	9.621	32.208	79.893	6.487	121.72
BL	9.621	37.646	74.037	8.784	124.23
BL	8.784	36.809	74.455	6.065	116.7
BL	8.366	31.79	75.71	6.537	112.93
BL	8.366	34.718	77.383	7.332	117.95
1R:4B	7.215	42.352	58.665	4.183	119.84
1R:4B	10.708	41.724	61.907	4.851	109.8
1R:4B	7.529	44.862	56.469	3.706	107.29
1R:4B	9.412	42.038	64.417	5.474	106.66
1R:4B	9.725	41.097	63.58	4.601	120.46
1R:4B	7.536	37.332	70.273	5.438	117.12
1R:4B	9.412	35.431	69.436	5.174	117.12
1R:4B	9.725	31.685	67.345	4.109	110.42
1R:4B	7.529	40.156	56.469	5.019	111.68
1R:4B	8.784	40.469	58.979	5.377	110.84
RL	9.63	34.823	63.162	3.451	101.64
RL	6.274	26.771	72.364	4.706	109.17
RL	9.621	30.117	70.273	5.961	107.29
RL	8.784	26.352	58.56	6.588	113.25
RL	9.202	30.535	59.397	4.706	114.19
RL	7.529	31.79	67.345	5.647	110.42
RL	6.274	30.646	69.854	5.019	108.75
RL	7.111	35.555	67.345	5.961	106.24
RL	6.902	27.189	71.527	4.392	102.89
RL	6.693	39.528	73.201	5.019	103.31
